# Supplementary material
Source: Springer Nature journal article supplement (https://www.springermedizin.de/resource/supplementary/12958_2003_107_MOESM6_ESM.pdf/9566134)

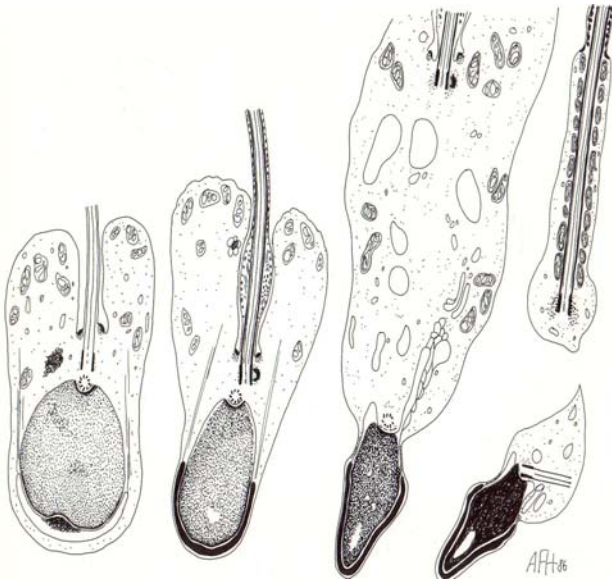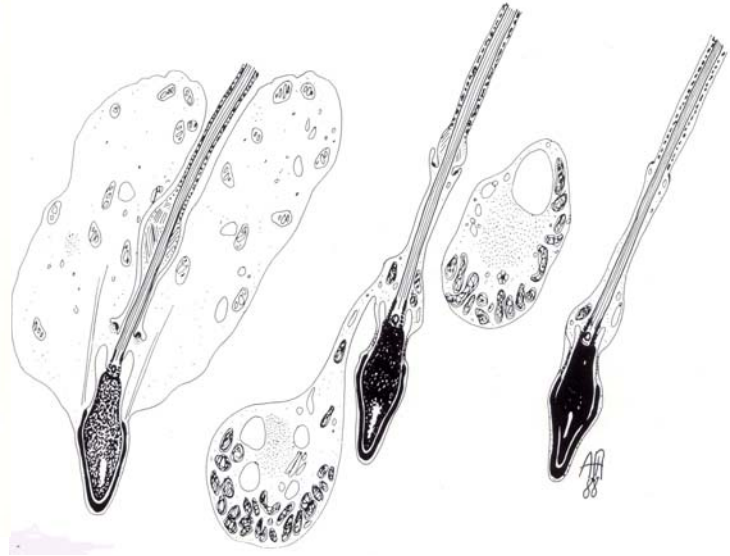

A

B

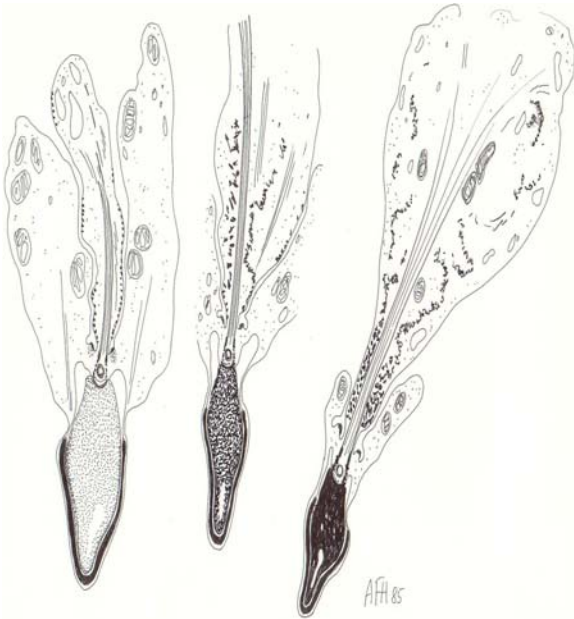

C

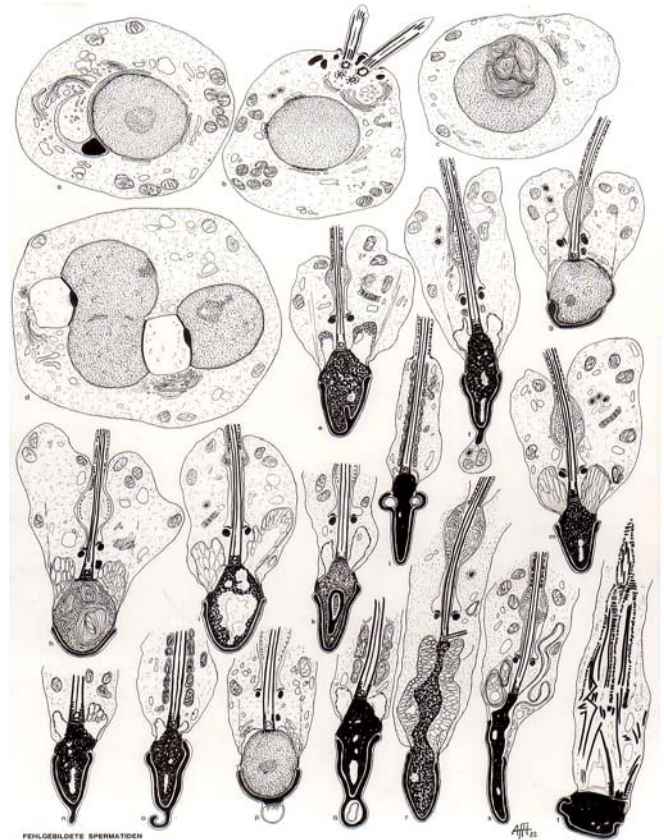

FEHLGEBAUETE SPERMATIEN

D

Supplement: MOESM6 [file 9566134]
